# Supplementary material
Source: PubMed Central journal article supplement (PMC4439935)

## **Li et al: TGF- $\beta$ induces PTHrP degradation in HCC**

### **Supplemental Methods**

#### **Metabolic Labeling**

HuH-7 cells were grown in 10-cm dishes ( $3.2 \times 10^5$  cells/dish) in complete medium overnight and starved for 4 h in methionine-free labeling medium (1X DMEM containing 500  $\mu\text{g/ml}$  L-cysteine, 4 mM L-glutamine, and 0.1% FBS) (3 ml/dish). The cells were then treated with or without TGF- $\beta$  in the presence or absence of lactacystin, a proteasomal inhibitor. Metabolic labeling was performed by the addition of L-[ $^{35}\text{S}$ ]methionine (Perkin-Elmer) at a final concentration of 50  $\mu\text{Ci/ml}$  for 24 h. Whole cell lysates were prepared followed by immunoprecipitation with an anti-PTHrP antibody and separation on a 4-12% Bis-Tris gel. The gel was then fixed in 10% Acetic Acid and 25% Methanol for 30 min and soaked in 1% Glycerol and 5% PEG 8000 for 30 min. Finally, the gel was dried at 80°C for 1 h under vacuum. Autoradiography was performed for 4 days using the Kodak MR film.

#### **Supplemental Figure 1. TGF- $\beta$ promotes *de novo* synthesis of the PTHrP protein.**

HuH-7 cells grown in 10-cm dishes were starved for 4 h in methionine-free labeling medium. The cells were then treated with or without TGF- $\beta$  in the presence or absence of lactacystin. At the same time, the cells were metabolically labeled with L-[ $^{35}\text{S}$ ]methionine at a final concentration of 50  $\mu\text{Ci/ml}$  for 24 h. Whole cell lysates

were prepared followed by immunoprecipitation, PAGE gel separation, and autoradiography.

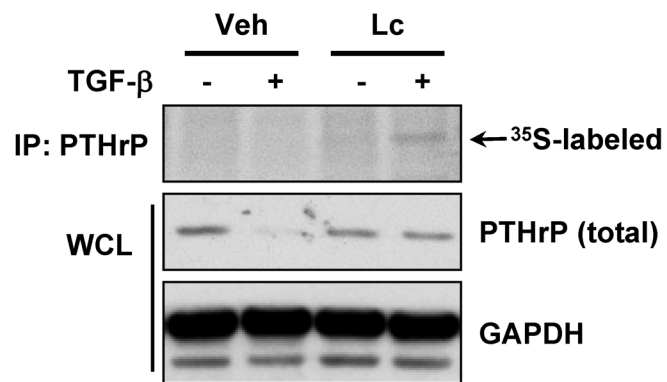

Supplement: jcav06p0511s1.pdf [file jcav06p0511s1.pdf]
